# Supplementary material for: Synthesis, crystal structure and photoluminescence studies of [Eu(dbm)3(impy)] and its polymer-based hybrid film
Source: Royal Society of Chemistry journal article supplement (doi:10.1039/c8nj04560g), 2019-01-01
Supplement: c8nj04560g1.pdf [file c8nj04560g1.pdf]

## Synthesis, crystal structure and photoluminescence studies of [Eu(dbm)<sub>3</sub>(impy)] and its polymer based hybrid film.

Najmul Hasan and K. Iftikhar\*

Lanthanide Research Laboratory

Department of Chemistry

Jamia Millia Islamia, New Delhi 110 025, India.

e-mail corresponding author: [kiftikhar@jmi.ac.in](mailto:kiftikhar@jmi.ac.in) (K. Iftikhar)

### Supplementary information

**Table S1.** Selected bond lengths(Å) and angles(deg.) for the complex, [Eu(dbm)<sub>3</sub>(impy)]

| Bond       | Bond length (Å) | Bond            | Bond angle (°) | Bond            | Bond angle (°) |
|------------|-----------------|-----------------|----------------|-----------------|----------------|
| Eu(1)-O(2) | 2.339(3)        | O(2)-Eu(1)-O(1) | 71.91(10)      | O(4)-Eu(1)-O(5) | 73.86(12)      |
| Eu(1)-O(1) | 2.341(3)        | O(2)-Eu(1)-O(6) | 150.45(11)     | O(2)-Eu(1)-N(1) | 98.94(11)      |
| Eu(1)-O(6) | 2.347(3)        | O(1)-Eu(1)-O(6) | 79.59(11)      | O(1)-Eu(1)-N(1) | 75.10(11)      |
| Eu(1)-O(3) | 2.349(3)        | O(2)-Eu(1)-O(3) | 92.27(12)      | O(6)-Eu(1)-N(1) | 80.70(11)      |
| Eu(1)-O(4) | 2.362(3)        | O(1)-Eu(1)-O(3) | 80.03(11)      | O(3)-Eu(1)-N(1) | 147.85(11)     |
| Eu(1)-O(5) | 2.392(3)        | O(6)-Eu(1)-O(3) | 74.99(12)      | O(4)-Eu(1)-N(1) | 139.80(11)     |
| Eu(1)-N(1) | 2.551(3)        | O(2)-Eu(1)-O(4) | 85.75(11)      | O(5)-Eu(1)-N(1) | 77.23(12)      |
| Eu(1)-N(3) | 2.633(3)        | O(1)-Eu(1)-O(4) | 142.30(12)     | O(2)-Eu(1)-N(3) | 70.05(11)      |
|            |                 | O(6)-Eu(1)-O(4) | 113.70(12)     | O(1)-Eu(1)-N(3) | 116.41(10)     |
|            |                 | O(3)-Eu(1)-O(4) | 70.70(11)      | O(6)-Eu(1)-N(3) | 132.18(11)     |
|            |                 | O(2)-Eu(1)-O(5) | 139.39(11)     | O(3)-Eu(1)-N(3) | 148.42(11)     |
|            |                 | O(1)-Eu(1)-O(5) | 141.35(11)     | O(4)-Eu(1)-N(3) | 81.75(10)      |
|            |                 | O(6)-Eu(1)-O(5) | 69.70(11)      | O(5)-Eu(1)-N(3) | 72.49(11)      |
|            |                 | O(3)-Eu(1)-O(5) | 112.53(12)     | N(1)-Eu(1)-N(3) | 63.11(11)      |

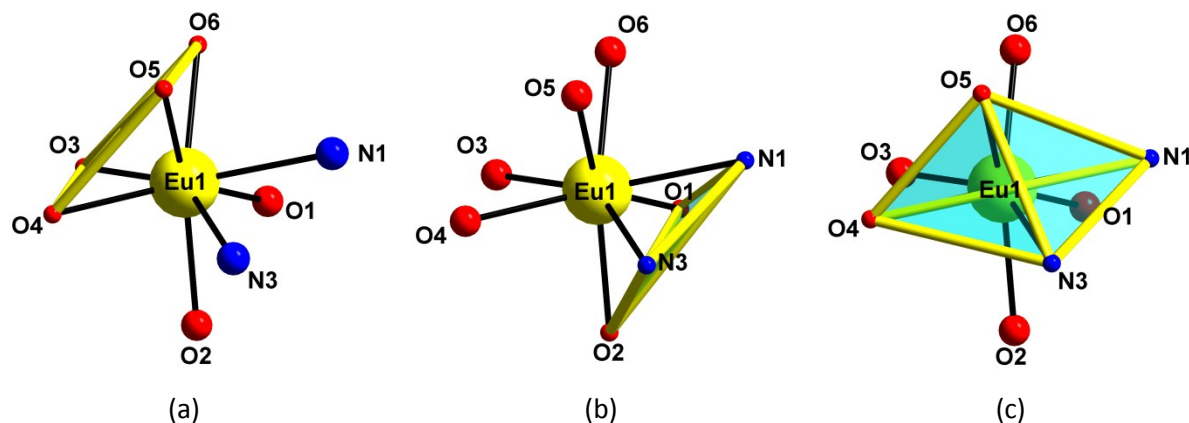

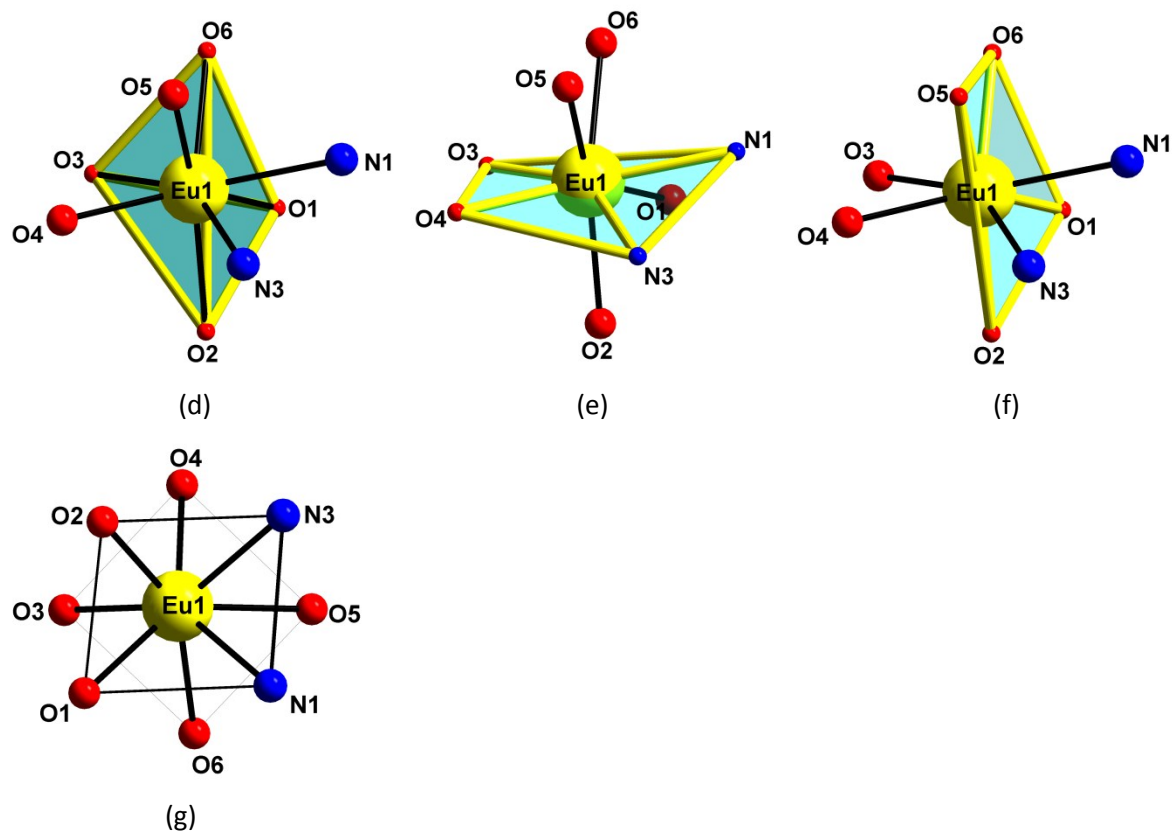

**Figure S1.** (a) (b) (c) (d) (e) and (f) are the dihedral plane which are showing their dihedral angle  $\delta_1$ ,  $\delta_2$ ,  $\delta_3$ ,  $\delta_4$ ,  $\varphi_1$  and  $\varphi_2$ , respectively and (g) is the polyhedra of  $[\text{Eu}(\text{dbm})_3(\text{imp})]$ .

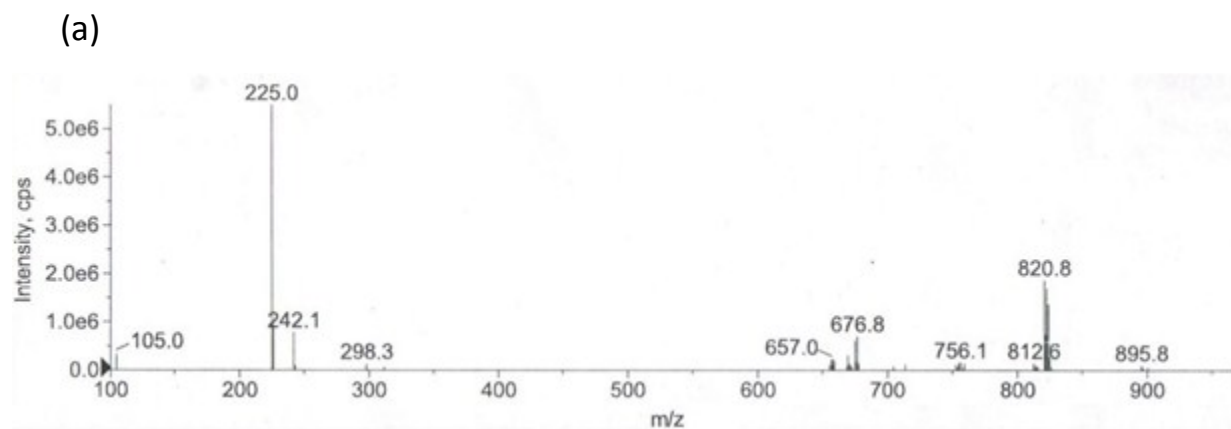

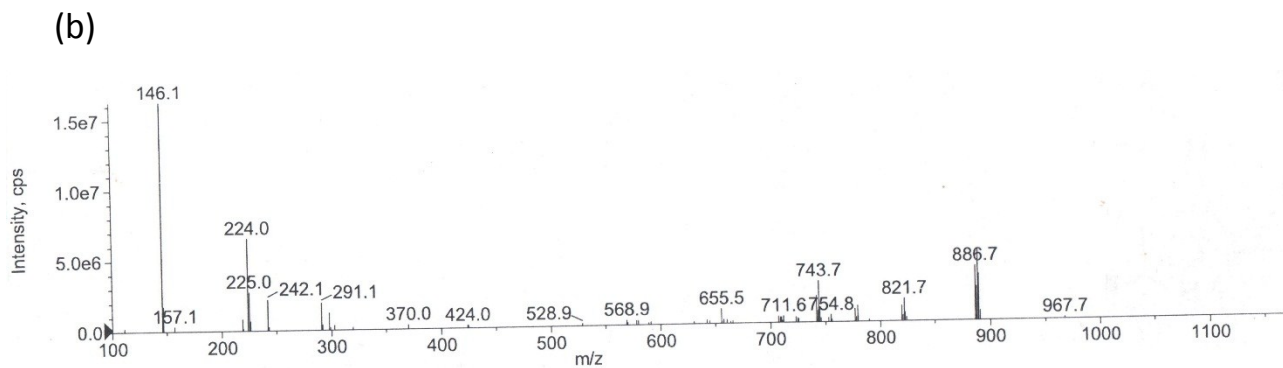

**Figure S2.** ESI-MS spectra in positive ion mode of  $[\text{Eu}(\text{dbm})_3(\text{H}_2\text{O})]\cdot\text{H}_2\text{O}$  (a) and  $[\text{Eu}(\text{dbm})_3(\text{impy})]$  (b).

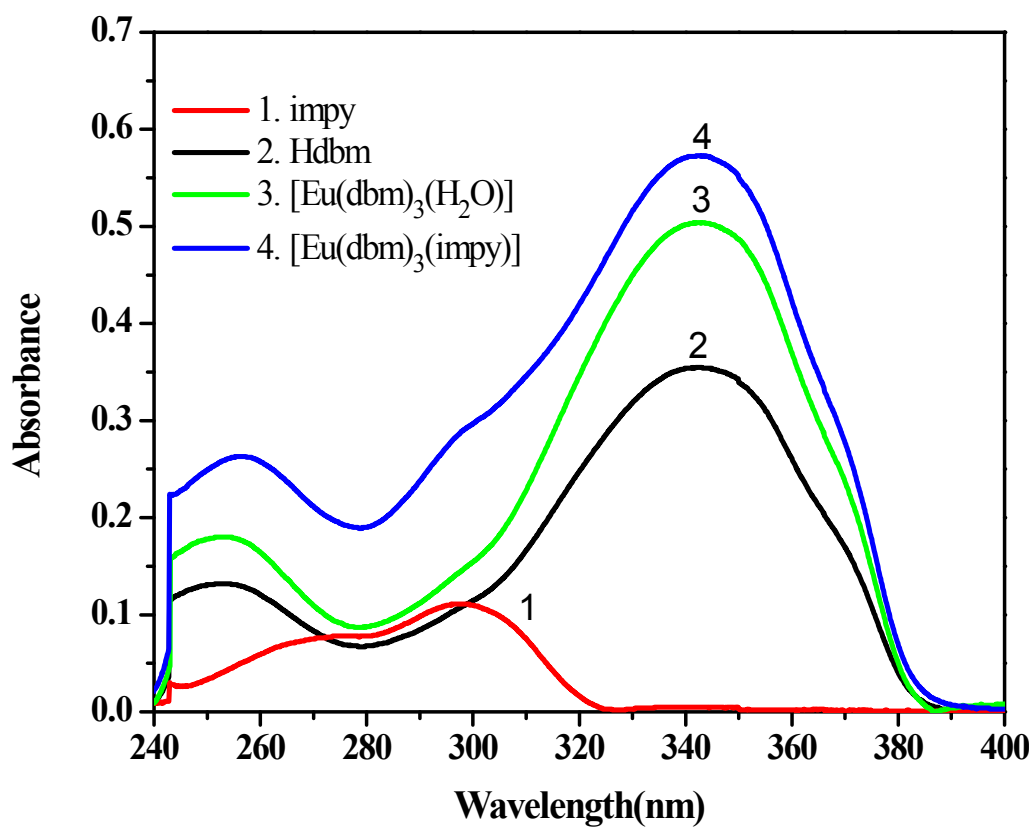

**Figure S3.** Absorption spectra of free ligands impy (1), Hdbm (2) and complexes  $[\text{Eu}(\text{dbm})_3(\text{H}_2\text{O})]$  (3),  $[\text{Eu}(\text{dbm})_3(\text{impy})]$  (4).

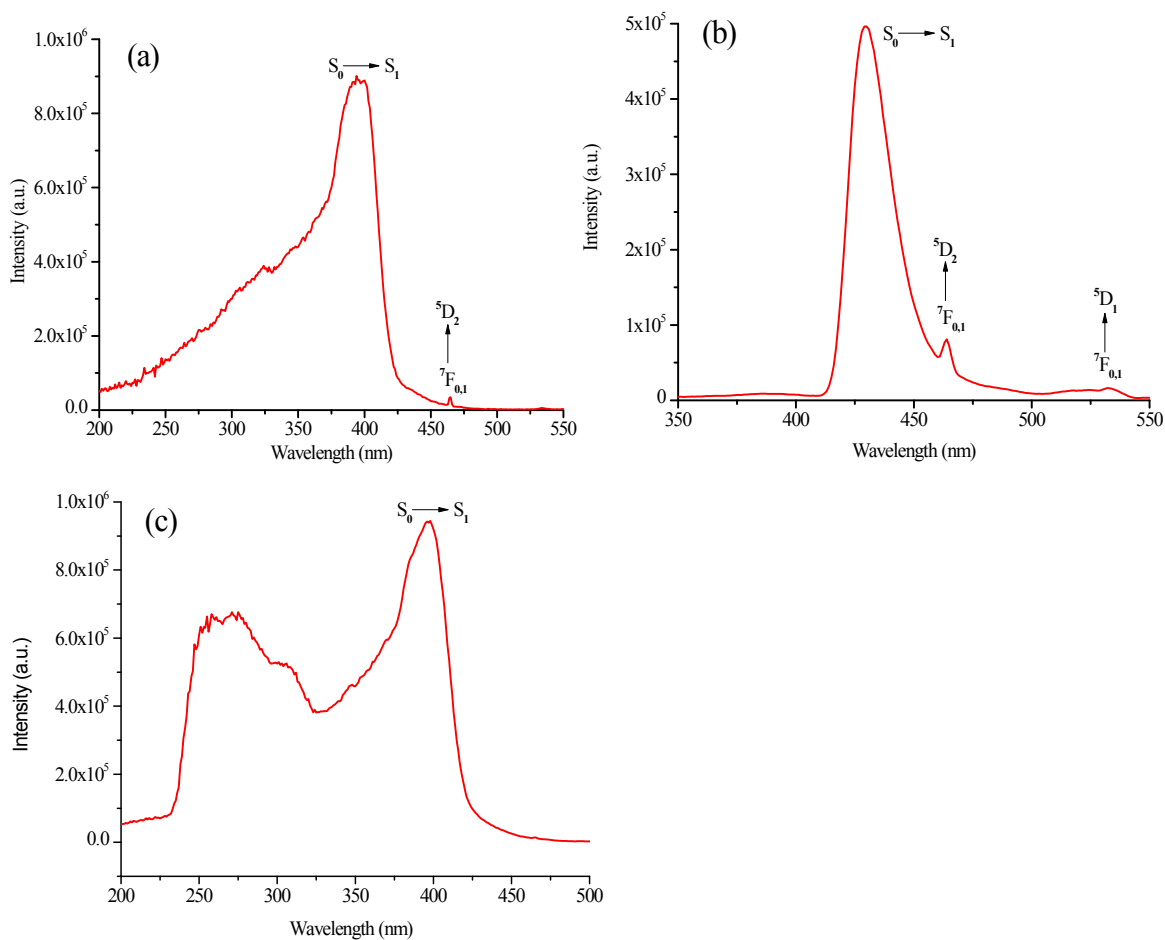

**Figure S4.** Excitation spectra of  $[\text{Eu}(\text{dbm})_3(\text{H}_2\text{O})]$  (a) solid state (b) in chloroform and (c) hybrid film.

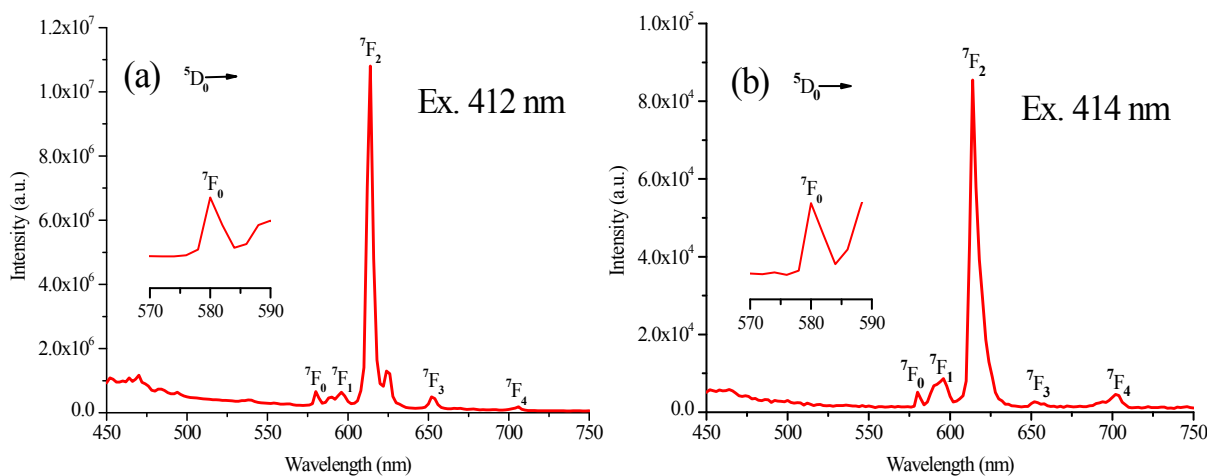

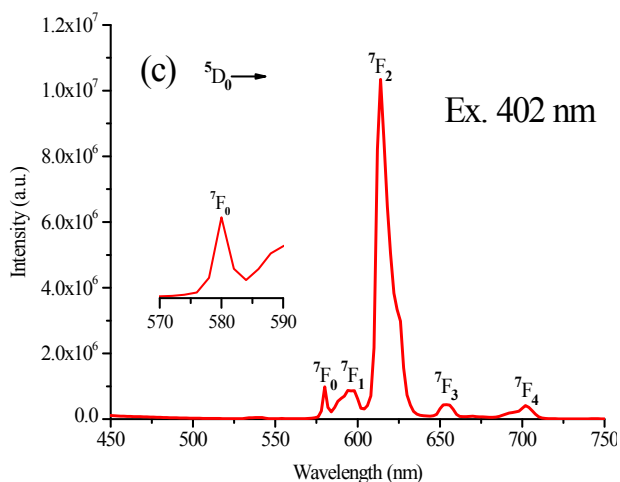

**Figure S5.** Emission spectra of  $[\text{Eu}(\text{dbm})_3(\text{H}_2\text{O})]$  (a) solid state (b) in chloroform and (c) hybrid film.

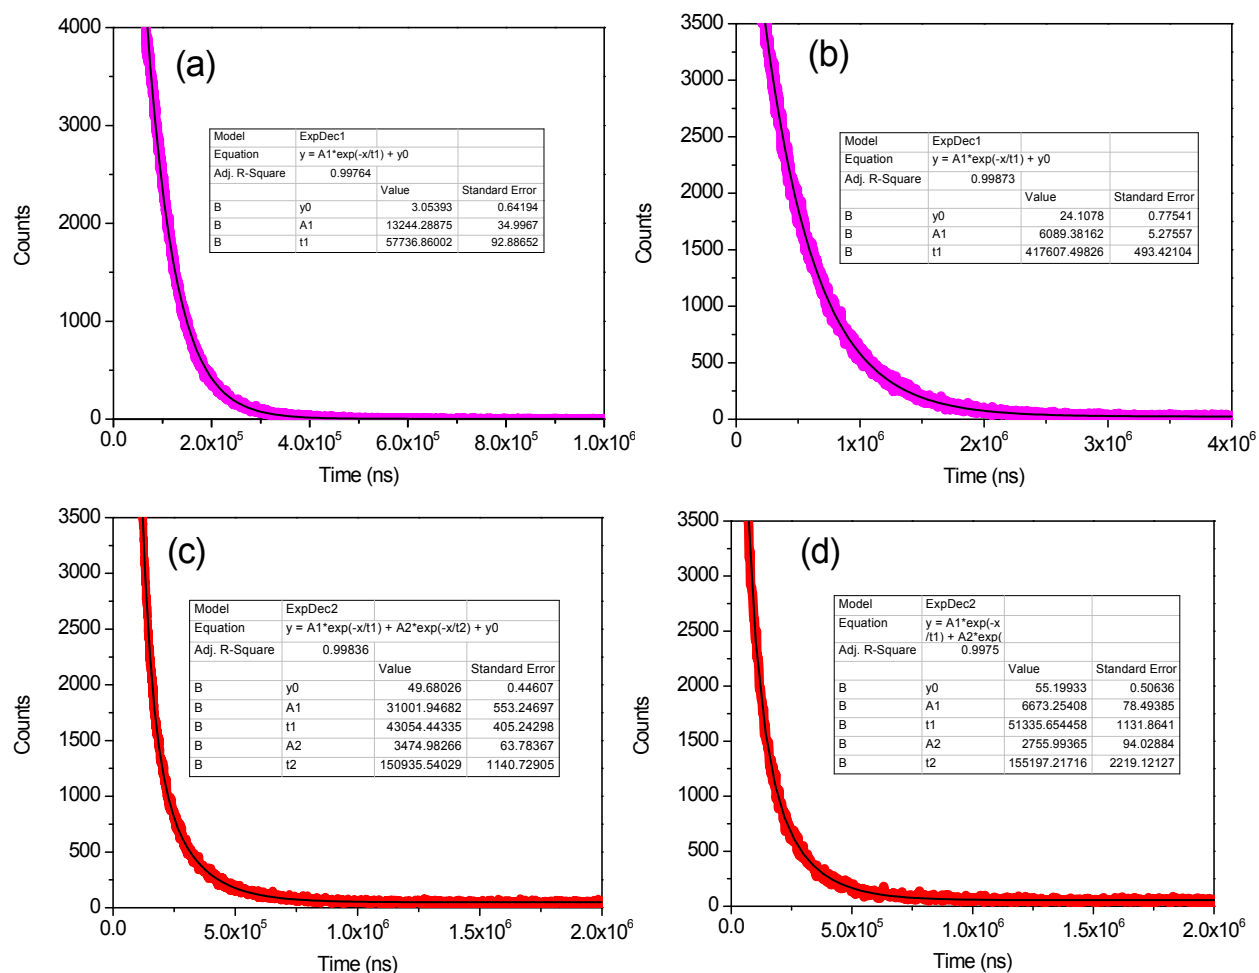

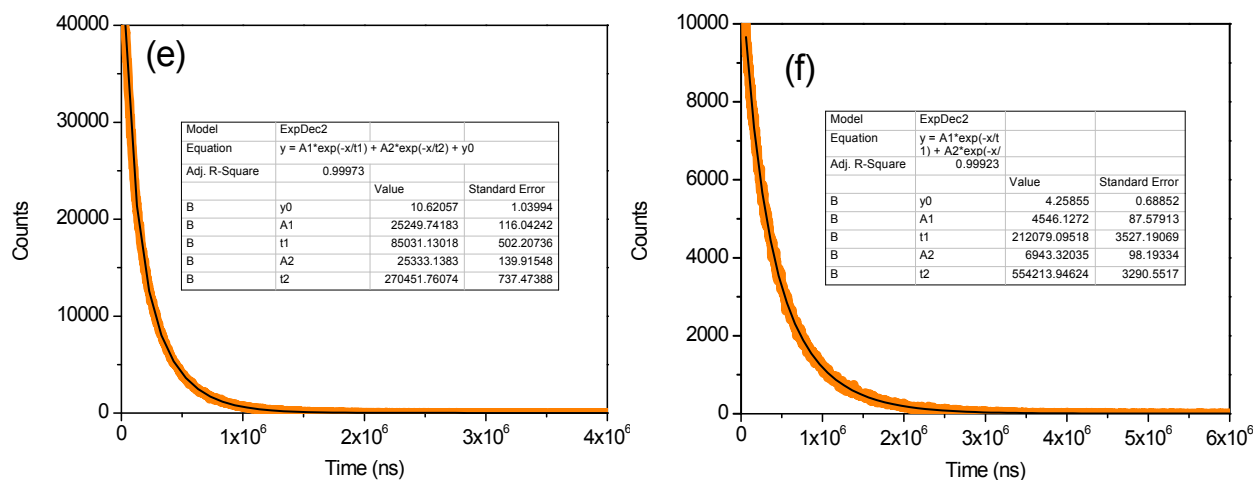

**Figure S6.** Decay time of  ${}^5D_0 \rightarrow {}^7F_2$  transition of  $[\text{Eu}(\text{dbm})_3(\text{H}_2\text{O})]$  (a) solid state (c) in chloroform (e) hybrid film and  $[\text{Eu}(\text{dbm})_3(\text{imp})]$  (b) solid state (d) in chloroform (f) hybrid film.
